# Supplementary material for: PD-13 非小細胞肺癌に対するSR259075(チラパザミン)とシスプラチンの臨床第I相試験 (非小細胞肺癌の化学治療(2))
Source: MDPI journal article supplement (doi:10.3390/molecules28083428), 2001-09-30
Supplement: s1 [file s1]

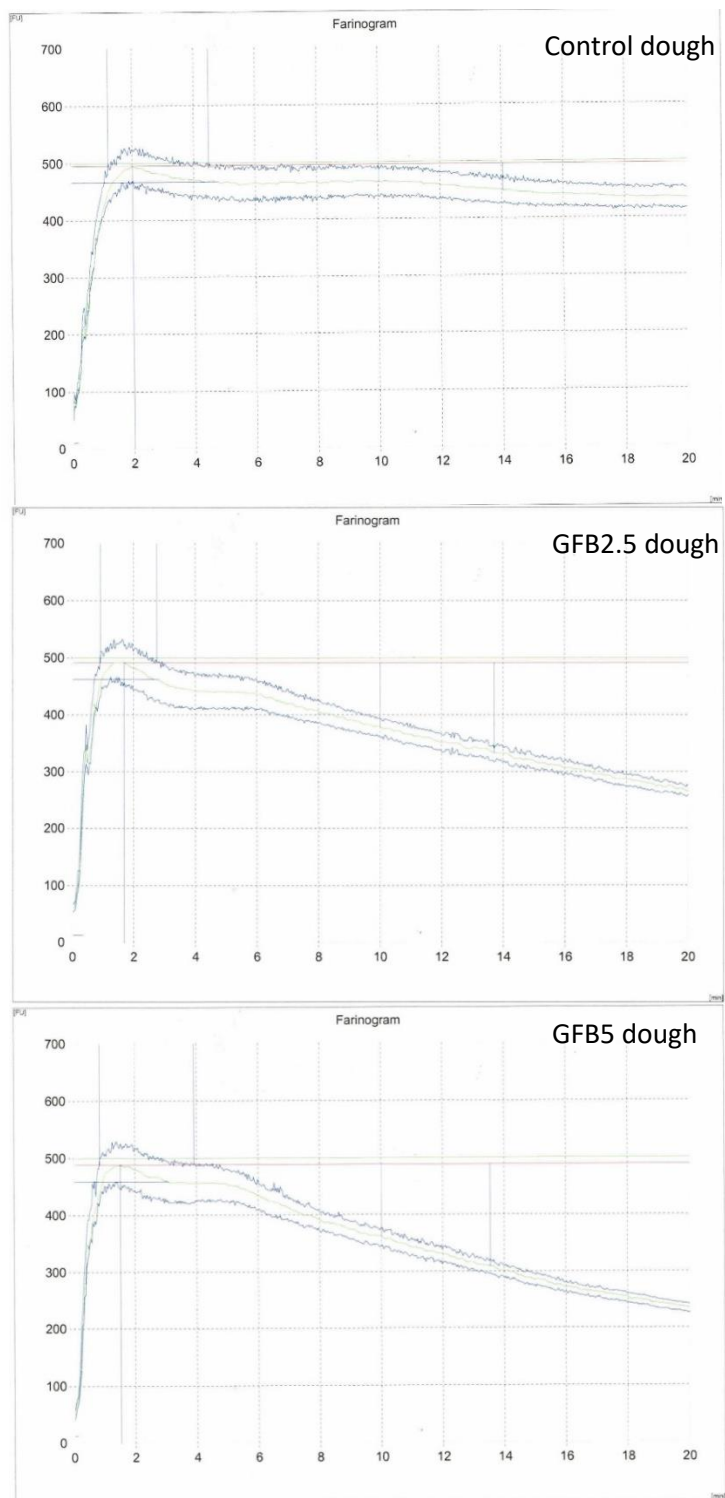

**Figure S1.** Farinograms of control (wheat) dough and wheat dough enriched with 2.5% (GFB2.5) and 5% (GFB5) “germinated + fermented” spelt flour.

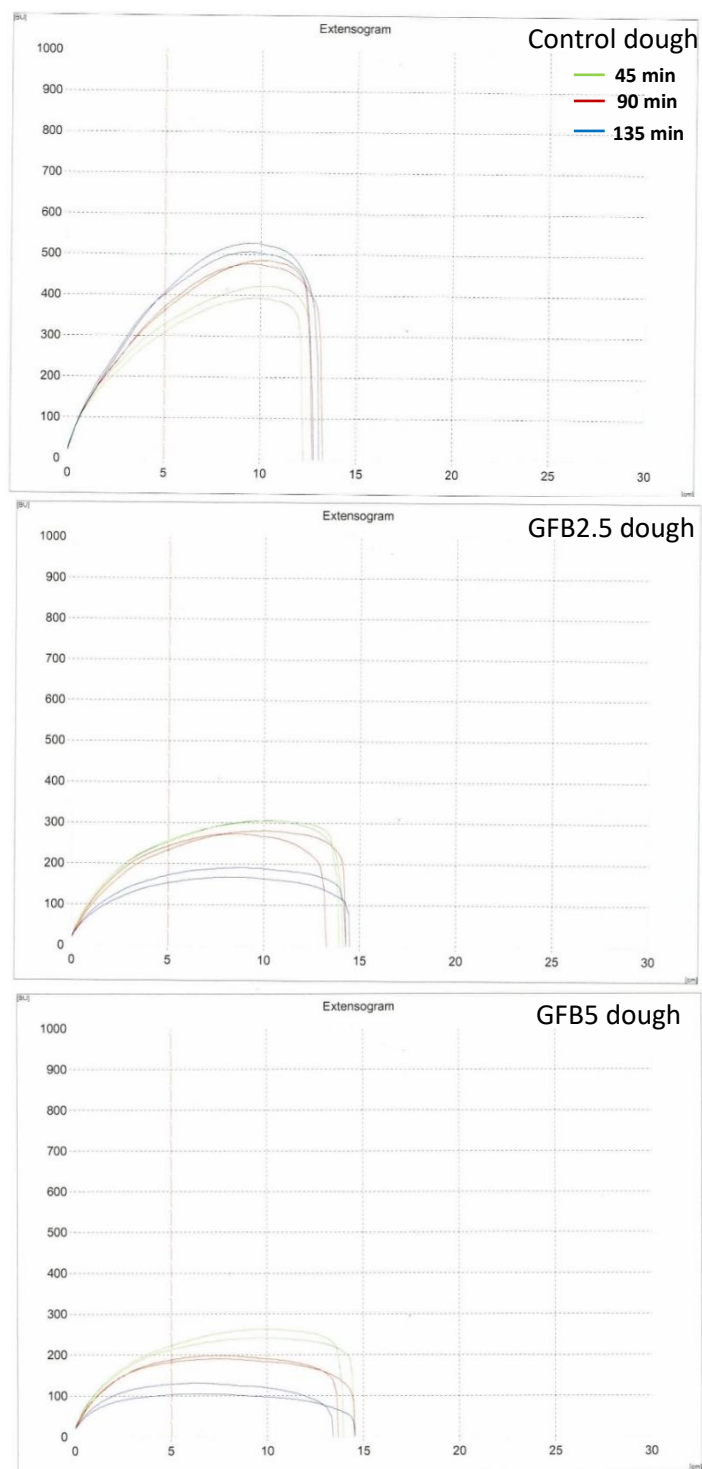

**Figure S2.** Extensiograms of control (wheat) dough and wheat dough enriched with 2.5% (GFB2.5) and 5% (GFB5) “germinated + fermented” spelt flour.

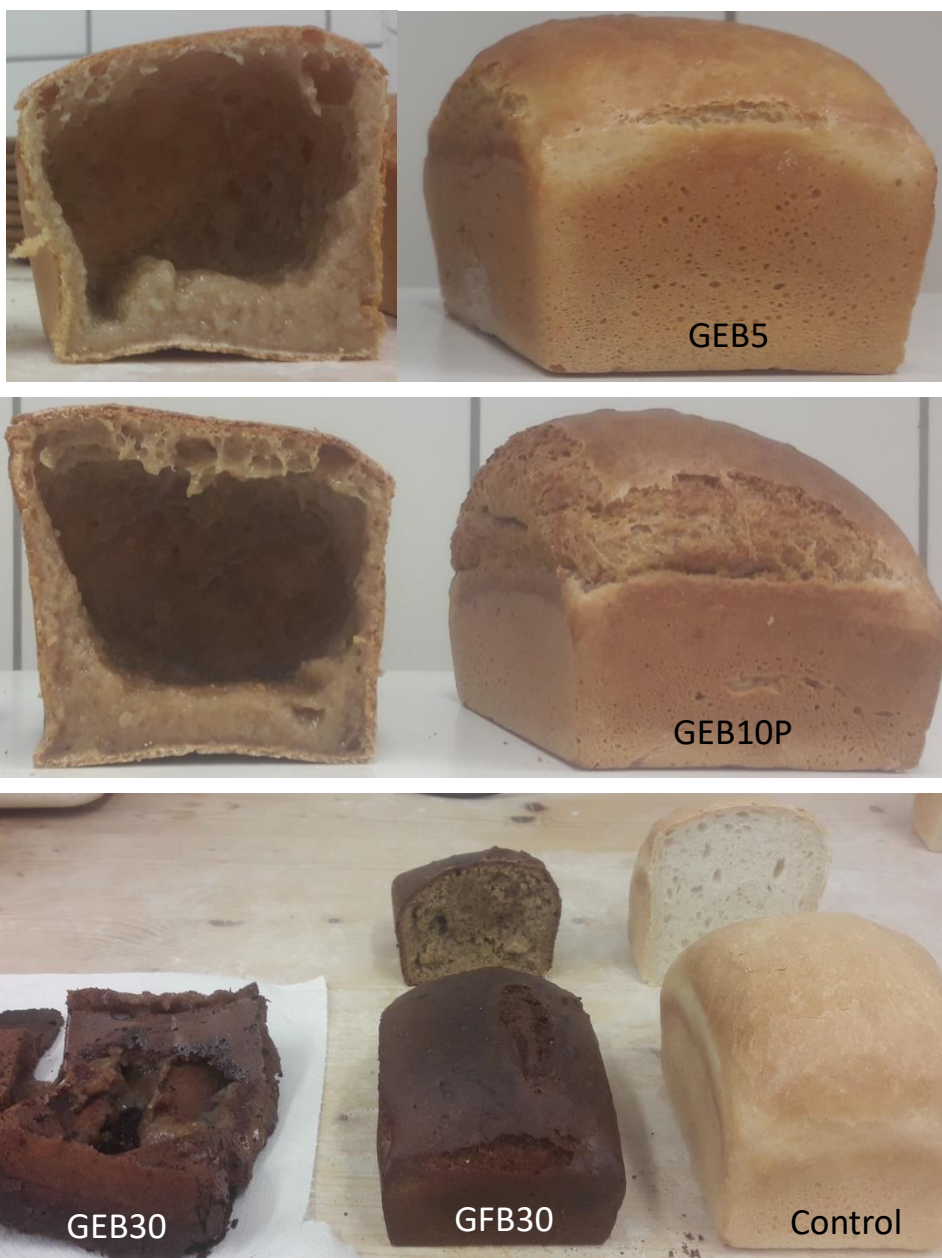

**Figure S3.** Photographs of breads prepared from white wheat flour (control), with 5% of »germinated + enzymatic treated« spelt flour (GEB5), with 10% of pasteurized »germinated + enzymatic treated« spelt flour (GEB10P), with 30% of “germinated + enzymatic treated” (GEB30) and with 30% of “germinated + fermented” spelt flour (GFB30).
